# Supplementary material
Source: publisher figshare collection journal article supplement (https://gsajournals.figshare.com/ndownloader/files/18131276)
Supplement: Supplementary file 1 [file 18131276]

## Sheet: Title
File S1. Raw behavioral data.
Note: Results for wt, unc-79(lf) and unc-80(lf) mutants were repeated used for comparison purpose.

## Sheet: Figure 1 Raw Data
Figure 1A
Strains	wt	unc-80(mac384)	unc-80(mac385)	unc-79(mac383)	unc-80(mac379)	unc-80(mac381)	unc-80(mac382)	unc-80(mac388)	mac387	unc-79(mac393)	unc-80(mac386)	unc-80(mac390)	unc-80(mac394)	unc-80(mac380)	unc-80(mac391)	unc-79(mac389)
	3 replicates	3 replicates	3 replicates	3 replicates	3 replicates	3 replicates	3 replicates	3 replicates	3 replicates	3 replicates	3 replicates	3 replicates	3 replicates	3 replicates	3 replicates	3 replicates
MeSa avoidance index	0.842	-0.118	-0.122	0.008	-0.086	-0.017	-0.006	-0.068	0.029	0.134	0.087	0.237	0.186	0.282	0.319	0.306
	0.73	-0.067	-0.004	-0.114	-0.019	-0.059	-0.043	0.076	0.12	0.146	0.147	0.23	0.319	0.077	0.242	0.207
	0.801	-0.091	-0.083	-0.074	-0.063	-0.041	-0.032	-0.013	0.001	0.153	0.239	0.113	0.122	0.282	0.142	0.191
Average	0.791	-0.092	-0.0696667	-0.06	-0.056	-0.039	-0.027	-0.00166667	0.05	0.144333	0.157667	0.193333	0.209	0.213667	0.234333	0.234667
Bonferroni's multiple comparison test
P-Value		<0.001	<0.001	<0.001	<0.001	<0.001	<0.001	<0.001	<0.001	<0.001	<0.001	<0.001	<0.001	<0.001	<0.001	<0.001
Figure 1B
	1-octanol avoidance							2-nonanone avoidance
Strains	wt	unc-80(mac379)	unc-79(mac383)	nca-2(gk5); nca-1(gk9)	mac387		Strains	wt	unc-80(mac379)	unc-79(mac383)	nca-2(gk5); nca-1(gk9)	mac387
	3 replicates	3 replicates	3 replicates	3 replicates	3 replicates			3 replicates	3 replicates	3 replicates	3 replicates	3 replicates
Avoidance index	0.612	0.619	0.431	0.602	0.221		Avoidance index	0.783	0.651	0.258	0.704	0.051
	0.653	0.616	0.506	0.657	-0.095			0.609	0.715	0.751	0.738	-0.105
	0.695	0.516	0.633	0.592	-0.083			0.584	0.835	0.651	0.62	-0.013
Average	0.653333	0.583667	0.523333	0.617	0.0143333		Average	0.658667	0.733667	0.553333	0.687333	-0.0223333
Bonferroni's multiple comparison test							Bonferroni's multiple comparison test
P-Value		>0.999	0.554	>0.999	<0.001		P-Value		>0.999	>0.999	>0.999	<0.001
	Diacetyl attraction							Benzaldehyde attraction
Strains	wt	unc-80(mac379)	unc-79(mac383)	nca-2(gk5); nca-1(gk9)	mac387		Strains	wt	unc-80(mac379)	unc-79(mac383)	nca-2(gk5); nca-1(gk9)	mac387
	3 replicates	3 replicates	3 replicates	3 replicates	3 replicates			3 replicates	3 replicates	3 replicates	3 replicates	3 replicates
Attraction index	0.91	0.867	0.943	0.888	-0.211		Attraction index	0.746	0.461	0.419	0.669	0.121
	0.943	0.88	0.898	0.889	-0.132			0.602	0.455	0.513	0.615	0.195
	0.847	0.883	0.852	0.823	0.096			0.716	0.656	0.584	0.669	-0.233
Average	0.9	0.876667	0.897667	0.866667	-0.0823333		Average	0.688	0.524	0.505333	0.651	0.0276667
Bonferroni's multiple comparison test							Bonferroni's multiple comparison test
P-Value		>0.999	>0.999	>0.999	<0.001		P-Value		0.562	0.442	>0.999	<0.001

## Sheet: Figure 2 Raw Data
Figure 2A
			unc-79(mac383)									unc-80(mac379)					nca-2(gk5); nca-1(gk9)
Strains	wt		No Tg		PLunc-79a::unc-79a_gDNA		PSunc-79a::unc-79a_gDNA		Punc-79b::unc-79b_gDNA			No Tg		Punc-80::unc-80_gDNA			No Tg		Pnca-1::nca-1_gDNA		Pnca-2::nca-2_gDNA		nca-1 Tg + nca-2 Tg
					line 1	line 2	line 1	line 2	line 1	line 2				line 1	line 2				line 1	line 2	line 1	line 2	line 1	line 2
	n = 40		n = 40		n = 20	n = 20	n = 20	n = 20	n = 20	n = 20		n = 40		n = 20	n = 20		n = 40		n = 20	n = 20	n = 20	n = 20	n = 20	n = 20
Body bends/min	28	23	3	1	15	12	5	6	3	2		3	2	31	15		1	2	30	4	3	35	31	61
	37	54	2	4	25	50	1	12	4	4		6	3	16	21		1	3	10	5	36	34	37	25
	59	60	1	1	60	44	8	6	2	7		4	4	24	23		3	1	6	8	25	19	20	45
	53	46	4	2	24	18	16	1	2	3		2	2	14	23		1	3	6	10	19	33	34	38
	55	25	3	1	35	59	7	13	5	1		2	2	23	32		3	4	3	9	50	28	18	54
	44	62	1	2	26	15	1	24	1	1		3	3	29	24		4	2	9	6	30	20	40	39
	56	52	1	1	61	8	11	13	0	1		3	6	9	39		2	3	9	5	4	23	33	49
	56	61	2	0	40	56	2	3	5	5		4	2	7	7		2	2	9	8	12	41	46	52
	31	54	1	2	20	46	3	16	2	0		2	2	14	18		2	3	4	14	40	14	30	45
	51	38	0	1	36	45	1	23	3	1		3	2	22	19		2	1	8	11	47	24	48	38
	53	55	1	1	12	43	4	4	5	2		2	3	21	25		4	6	5	35	33	27	59	47
	44	54	0	0	50	61	14	5	1	4		2	3	23	13		3	2	17	22	28	27	41	62
	34	50	2	1	57	35	5	3	0	1		1	3	17	28		3	1	2	42	51	30	34	44
	46	54	2	2	53	35	9	4	1	3		2	3	18	12		1	4	35	4	52	32	40	71
	59	44	2	2	36	28	6	2	2	1		2	3	17	31		2	4	6	35	36	17	42	21
	51	54	2	9	47	54	2	2	4	2		1	2	21	9		1	1	16	13	47	19	35	23
	34	44	1	2	20	29	2	2	2	2		1	3	19	24		1	2	8	5	18	34	60	41
	47	56	2	1	42	58	2	4	5	1		2	2	9	29		0	1	3	5	25	23	60	53
	52	61	2	4	34	32	1	4	1	2		2	2	8	32		3	1	14	5	36	35	23	33
	28	39	3	4	48	18	1	4	6	0		3	3	22	21		3	1	28	10	28	46	42	14
Average	47.6		1.9		37.175		6.3		2.425			2.625		20.225			2.225		12.1		29.525		40.7
Bonferroni's multiple comparison test												T-test					Bonferroni's multiple comparisons test
P-Value					<0.001		0.066		>0.999			P-Value		<0.001			P-Value		<0.001		<0.001		<0.001
	6 replicates		6 replicates		3 replicates	3 replicates	3 replicates	3 replicates	3 replicates	3 replicates		6 replicates		3 replicates	3 replicates		6 replicates		3 replicates	3 replicates	3 replicates	3 replicates	3 replicates	3 replicates
MeSa avoidance index	0.9	0.86	-0.14	-0.16	0.83	0.68	0.86	0.85	-0.03	-0.02		0.15	0.19	0.75	0.82		0.11	-0.07	0.55	0.8	0.9	0.86	0.89	0.92
	0.92	0.74	0.16	-0.17	0.75	0.72	0.64	0.79	0.12	-0.07		0.22	0.12	0.92	0.87		-0.08	-0.1	0.65	0.76	0.87	0.79	0.98	0.89
	0.91	0.87	0.11	0.27	0.64	0.82	0.83	0.78	0.01	0.13		0.13	0.13	0.82	0.85		-0.07	-0.08	0.66	0.65	0.8	0.76	0.93	0.89
Average	0.866667		0.0116667		0.74		0.791667		0.0233333			0.156667		0.838333			-0.0483333		0.678333		0.83		0.916667
Bonferroni's multiple comparison test												T-test					Bonferroni's multiple comparison test
P-Value					<0.001		<0.001		>0.999			P-Value		<0.001			P-Value		<0.001		<0.001		<0.001
Figure 2B
Strains	wt	nca-1(gk9)	nca-2(gk5)	nca-2(gk5); nca-1(gk9)	unc-79(mac383)	unc-80(mac379)	unc-79(mac383); unc-80(mac379)	unc-79(mac383); nca-1(e625)	nca-1(e625); unc-80(mac379)	nlf-1(mac409)	nca-1(gk9); nlf-1(mac409)	nca-2(gk5); nlf-1(mac409)	nca-1(e625); nlf-1(mac409)
	n = 40	n = 40	n = 40	n = 40	n = 40	n = 40	n = 40	n = 40	n = 40	n = 40	n = 40	n = 40	n = 40
Body bends/min	28	31	27	1	3	3	1	2	2	5	2	24	36
	37	36	8	1	2	6	1	1	1	32	7	22	45
	59	26	22	3	1	4	1	3	2	12	8	4	35
	53	33	23	1	4	2	2	4	3	18	2	10	42
	55	53	8	3	3	2	1	5	2	19	2	14	32
	44	40	13	4	1	3	4	3	1	32	1	3	20
	56	42	21	2	1	3	1	1	2	8	1	1	38
	56	37	11	2	2	4	2	1	3	15	14	2	19
	31	34	35	2	1	2	2	2	1	32	19	14	38
	51	38	31	2	0	3	2	3	8	34	18	15	15
	53	51	19	4	1	2	2	3	2	26	3	13	10
	44	30	23	3	0	2	2	2	2	10	1	8	41
	34	50	10	3	2	1	0	1	2	17	5	28	41
	46	41	23	1	2	2	1	1	1	18	29	7	30
	59	27	11	2	2	2	0	3	3	38	1	5	39
	51	40	33	1	2	1	0	1	2	37	5	6	39
	34	28	11	1	1	1	3	2	3	19	12	6	16
	47	46	24	0	2	2	1	2	2	5	1	16	36
	52	44	24	3	2	2	2	2	3	35	7	5	27
	28	46	27	3	3	3	1	4	2	28	2	35	40
	23	32	25	2	1	2	2	4	3	11	3	3	30
	54	47	10	3	4	3	2	1	2	21	3	6	32
	60	42	18	1	1	4	0	1	4	14	6	3	33
	46	40	19	3	2	2	2	1	2	5	4	2	29
	25	38	24	4	1	2	1	4	4	25	1	6	37
	62	32	33	2	2	3	1	1	2	13	3	1	35
	52	42	9	3	1	6	2	1	4	14	18	4	25
	61	51	16	2	0	2	2	3	8	44	21	4	40
	54	32	35	3	2	2	1	4	2	20	4	3	34
	38	48	22	1	1	2	1	3	3	20	8	2	22
	55	47	15	6	1	3	1	1	2	47	1	4	20
	54	22	25	2	0	3	1	2	5	18	2	3	22
	50	50	27	1	1	3	1	1	4	32	2	7	25
	54	38	31	4	2	3	2	3	3	2	18	2	27
	44	39	24	4	2	3	1	2	4	24	14	23	40
	54	49	20	1	9	2	0	1	4	4	4	3	36
	44	42	49	2	2	3	1	2	4	16	10	4	42
	56	44	13	1	1	2	1	2	3	25	17	13	33
	61	32	27	1	4	2	2	2	3	12	3	4	36
	39	33	32	1	4	3	2	2	2	21	24	1	21
Average	47.6	39.325	21.95	2.225	1.9	2.625	1.375	2.175	2.875	20.7	7.65	8.4	31.45
Bonferroni's multiple comparison test
P-Value		<0.001	<0.001	<0.001	<0.001	<0.001	<0.001	<0.001	<0.001	<0.001	<0.001	<0.001	<0.001
		nca-1(gk9) vs. nca-2(gk5)								……vs. nlf-1(mac409)
	P-Value	<0.001								P-Value	<0.001	<0.001	<0.001
	6 replicates	4 replicates	4 replicates	4 replicates	6 replicates	6 replicates	6 replicates	4 replicates	5 replicates	6 replicates	3 replicates	3 replicates	5 replicates
MeSa avoidance index	0.9	0.603	0.689	0.112	-0.142	0.153	-0.168	0.278	0.144	0.651	0.494	0.668	0.947
	0.921	0.889	0.832	-0.076	0.157	0.219	-0.145	0.02	0.065	0.787	0.596	0.622	0.829
	0.913	0.628	0.639	-0.071	0.106	0.126	0.119	0.045	0.142	0.75	0.73	0.606	0.801
	0.859	0.688	0.776	-0.069	-0.158	0.188	0.128	0.119	-0.014	0.75			0.841
	0.74				-0.171	0.123	0.046		-0.046	0.829			0.668
	0.873				0.269	0.131	0.059			0.575
Average	0.867667	0.702	0.734	-0.026	0.0101667	0.156667	0.0065	0.1155	0.0582	0.723667	0.606667	0.632	0.8172
Bonferroni's multiple comparison test
P-Value		0.269	0.756	<0.001	<0.001	<0.001	<0.001	<0.001	<0.001	0.315	0.017	0.043	>0.999

## Sheet: Figure 4 Raw Data
Figure 4A
			unc-80(mac379); Ex[Promoter::unc-80 cDNA]
Strains	wt		No Tg		Punc-80		Pnlf-1		Pnmr-1		Pglr-1		Pflp-1/Pflp-18/Punc-7b		Pflp-1		Pflp-18		Punc-7b		Pmgl-1		Psra-11		PLunc-79a		PSunc-79a
					line 1	line 2	line 1	line 2	line 1	line 2	line 1	line 2	line 1	line 2	line 1	line 2	line 1	line 2	line 1	line 2	line 1	line 2	line 1	line 2	line 1	line 2	line 1	line 2
	n = 40		n = 40		n = 20	n = 20	n = 20	n = 20	n = 20	n = 20	n = 20	n = 20	n = 20	n = 20	n = 20	n = 20	n = 20	n = 20	n = 20	n = 20	n = 20	n = 20	n = 20	n = 20	n = 20	n = 20	n = 20	n = 20
Body bends/min	28	23	3	2	5	1	2	33	3	2	4	4	6	2	5	4	3	5	2	11	3	5	5	2	30	26	4	3
	37	54	6	3	17	25	33	31	1	4	19	2	2	7	10	4	1	3	3	2	2	3	2	13	33	12	6	3
	59	60	4	4	17	6	5	5	12	12	2	4	2	6	2	12	2	4	5	5	2	4	3	3	48	31	5	6
	53	46	2	2	38	39	26	28	4	6	5	7	8	2	3	2	4	2	1	3	4	5	2	1	8	25	3	4
	55	25	2	2	7	1	14	25	1	13	4	3	4	6	5	6	2	2	14	16	2	2	4	5	36	70	5	1
	44	62	3	3	33	2	29	17	2	5	5	6	8	7	1	6	3	2	2	4	3	2	2	2	42	6	3	12
	56	52	3	6	5	34	32	19	5	2	4	2	1	9	2	9	13	2	3	2	13	6	4	2	14	47	1	3
	56	61	4	2	6	2	25	11	4	1	6	5	1	1	2	12	7	12	5	11	1	7	2	7	35	44	2	2
	31	54	2	2	1	17	5	4	7	12	4	2	2	7	5	3	1	3	1	4	6	3	5	2	32	15	3	2
	51	38	3	2	16	7	30	20	6	2	7	4	8	5	3	4	9	2	3	6	5	2	15	2	24	31	3	11
	53	55	2	3	46	37	31	23	2	3	3	4	6	1	5	7	3	12	2	1	3	2	3	12	6	39	1	11
	44	54	2	3	19	10	19	27	11	1	2	12	9	2	1	1	4	2	4	6	5	3	5	5	30	26	4	2
	34	50	1	3	16	4	22	28	3	2	2	6	7	6	5	8	1	13	2	2	1	13	2	1	12	45	4	6
	46	54	2	3	28	2	34	20	15	4	10	3	8	2	3	2	2	3	2	7	2	3	10	14	36	20	6	2
	59	44	2	3	36	32	10	13	3	2	3	2	7	2	5	5	3	1	2	3	7	1	9	2	33	47	3	2
	51	54	1	2	25	6	12	16	5	7	6	5	6	8	5	2	7	2	4	2	1	13	2	2	56	10	2	4
	34	44	1	3	15	14	26	31	2	20	2	3	5	2	1	12	2	4	5	4	2	4	5	3	14	31	2	7
	47	56	2	2	1	13	33	23	5	2	2	2	7	6	3	2	11	2	3	13	12	9	3	2	55	25	2	8
	52	61	2	2	10	5	31	30	10	4	1	9	4	8	5	7	1	5	10	5	4	5	5	2	51	11	3	2
	28	39	3	3	20	21	25	10	1	15	3	3	3	1	2	4	2	16	15	2	2	2	5	3	45	30	7	2
Average	47.6		2.625		15.975		21.45		5.525		4.55		4.85		4.625		4.45		4.925		4.35		4.45		30.775		4.05
Bonferroni's multiple comparisons test
P-Value					<0.001		<0.001		0.711		>0.999		>0.999		>0.999		>0.999		>0.999		>0.999		>0.999		<0.001		>0.999
	6 replicates		6 replicates		3 replicates	3 replicates	3 replicates	3 replicates	3 replicates	3 replicates	3 replicates	3 replicates	3 replicates	3 replicates	3 replicates	3 replicates	3 replicates	3 replicates	3 replicates	3 replicates	3 replicates	3 replicates	3 replicates	3 replicates	3 replicates	3 replicates	3 replicates	3 replicates
MeSa avoidance index	0.89	0.918	0.153	0.188	0.672	0.873	0.954	0.906	0.591	0.586	0.629	0.629	0.52	0.659	0.207	0.187	0.066	0.181	0.118	0.269	0.166	0.116	0.102	0.112	0.832139	0.842	0.127	0.207
	0.94	0.857	0.219	0.123	0.58	0.644	0.821	0.853	0.56	0.66	0.691	0.528	0.572	0.652	0.188	0.13	0.14	0.17	0.141	0.158	0.129	0.188	0.101	0.124	0.832	0.805946	0.103	0.166
	0.821	0.854	0.126	0.131	0.826	0.563	0.785	0.892	0.55	0.621	0.578	0.583	0.651	0.666	0.167	0.142	0.179	-0.019	0.198	0.055	0.168	0.216	0.048	0.142	0.824	0.841615	0.141	0.17
Average	0.88		0.156667		0.693		0.8685		0.594667		0.606333		0.62		0.170167		0.1195		0.1565		0.163833		0.104833		0.829617		0.152333
Bonferroni's multiple comparisons test
P-Value					<0.001		<0.001		<0.001		<0.001		<0.001		>0.999		>0.999		>0.999		>0.999		>0.999		<0.001		>0.999
Figure 4B
					PU6::unc-80_sgRNA#1+#2; Promoter::Cas9								PU6::unc-79_sgRNAs#1+#2; Promoter::Cas9
Strains	wt		unc-80(mac379)		Punc-119		Pnmr-1		Punc-80		unc-79(mac383)		Punc-119		PLunc-79a		PSunc-79a
					line 1	line 2	line 1	line 2	line 1	line 2			line 1	line 2	line 1	line 2	line 1	line 2
	n = 40		n = 40		n = 20	n = 20	n = 20	n = 20	n = 20	n = 20	n = 40		n = 20	n = 20	n = 20	n = 20	n = 20	n = 20
Body bends/min	28	23	3	2	3	4	14	4	41	55	3	1	7	25	9	35	5	15
	37	54	6	3	6	8	7	3	37	47	2	4	2	35	10	1	6	7
	59	60	4	4	2	7	11	3	46	57	1	1	7	10	3	15	7	14
	53	46	2	2	9	7	36	46	45	41	4	2	8	5	24	4	3	22
	55	25	2	2	13	35	5	52	54	50	3	1	6	5	14	8	16	7
	44	62	3	3	8	4	37	4	55	43	1	2	3	5	18	5	10	14
	56	52	3	6	4	20	18	35	54	37	1	1	15	3	26	17	6	22
	56	61	4	2	2	8	17	5	44	57	2	0	1	3	4	2	18	7
	31	54	2	2	3	10	27	15	47	32	1	2	40	2	2	35	8	10
	51	38	3	2	2	9	28	60	68	51	0	1	3	3	4	6	11	4
	53	55	2	3	19	7	15	34	35	35	1	1	4	10	27	16	4	4
	44	54	2	3	13	30	23	17	63	55	0	0	5	5	25	8	9	13
	34	50	1	3	6	6	29	2	29	58	2	1	45	6	4	3	3	13
	46	54	2	3	3	6	35	10	35	36	2	2	20	10	9	14	6	12
	59	44	2	3	27	9	55	45	55	46	2	2	3	21	3	28	16	9
	51	54	1	2	2	5	58	3	58	37	2	9	10	3	14	8	7	12
	34	44	1	3	19	6	3	55	62	42	1	2	3	4	34	14	16	11
	47	56	2	2	27	19	13	47	70	51	2	1	4	6	20	11	7	8
	52	61	2	2	3	3	11	57	45	58	2	4	3	31	6	25	2	3
	28	39	3	3	3	9	13	41	39	27	3	4	48	23	12	4	14	4
Average	47.6		2.625		9.65		24.825		47.425		1.9		11.3		13.175		9.625
Bonferroni's multiple comparisons test
P-Value			<0.001		<0.001		<0.001		>0.999		<0.001		<0.001		<0.001		<0.001
	6 replicates		6 replicates		3 replicates	3 replicates	3 replicates	3 replicates	3 replicates	3 replicates	6 replicates		3 replicates	3 replicates	3 replicates	3 replicates	3 replicates	3 replicates
MeSa avoidance index	0.89	0.918	0.153	0.188	0.848	0.801	0.794	0.777	0.879	0.913	-0.142	-0.158	0.767	0.829	0.650516	0.641419	0.675	0.775
	0.94	0.857	0.219	0.123	0.755	0.78	0.824	0.877	0.876	0.849	0.157	-0.171	0.807	0.778	0.728949	0.694023	0.794	0.783
	0.821	0.854	0.126	0.131	0.837	0.802	0.802	0.919	0.919	0.931	0.106	0.269	0.797	0.808	0.67645	0.645567	0.753	0.792
Average	0.88		0.156667		0.803833		0.832167		0.8945		0.0101667		0.797667		0.672821		0.762
Bonferroni's multiple comparisons test
P-Value			<0.001		0.639		>0.999		>0.999		<0.001		0.472		<0.001		0.064

## Sheet: Additional Raw Data
Canonical unc-80 and unc-79 loss-of-function mutants exhibit defective MeSa avoidance responses
Strains	wt	unc-80(e1272)	unc-79(1069)
	3 replicates	3 replicates	3 replicates
MeSa avoidance index	0.843971	0.0607251	-0.0141216
	0.814711	-0.131647	0.0953267
	0.799887	-0.0358756	-0.0201623
Average	0.819523	-0.035599	0.0203476
Bonferroni's multiple comparisons test
P-Value		<0.001	<0.001
An unc-79 cDNA transgene can rescue the behavioral defects of unc-79(mac383) mutants
Strains	wt		unc-79(mac383)		unc-79(mac383); Ex[PLunc-79a::unc-79a_cDNA]
			No Tg		line 1	line 2
	n = 40		n = 40		n = 20	n = 20
Body bends/min	28	23	3	1	27	40
	37	54	2	4	15	38
	59	60	1	1	27	53
	53	46	4	2	15	51
	55	25	3	1	16	35
	44	62	1	2	30	52
	56	52	1	1	29	17
	56	61	2	0	23	31
	31	54	1	2	45	30
	51	38	0	1	28	17
	53	55	1	1	13	47
	44	54	0	0	27	18
	34	50	2	1	19	25
	46	54	2	2	13	42
	59	44	2	2	22	28
	51	54	2	9	17	43
	34	44	1	2	48	24
	47	56	2	1	28	29
	52	61	2	4	36	50
	28	39	3	4	35	21
Average	47.6		1.9		30.1
Bonferroni's multiple comparisons test
P-Value					<0.001
	6 replicates		6 replicates		3 replicates	3 replicates
MeSa avoidance index	0.9	0.86	-0.14	-0.16	0.900732	0.808889
	0.92	0.74	0.16	-0.17	0.895771	0.909
	0.91	0.87	0.11	0.27	0.808715	0.87687
Average	0.866667		0.0116667		0.866663
Bonferroni's multiple comparisons test
P-Value					<0.001
